# Supplementary material for: A new view of the tree of life
Source: Springer Nature journal article supplement (doi:10.1038/nmicrobiol.2016.48), 2016-04-11
Supplement: 41564_2016_BFnmicrobiol201648_MOESM204_ESM.pdf [file 41564_2016_BFnmicrobiol201648_MOESM204_ESM.pdf]

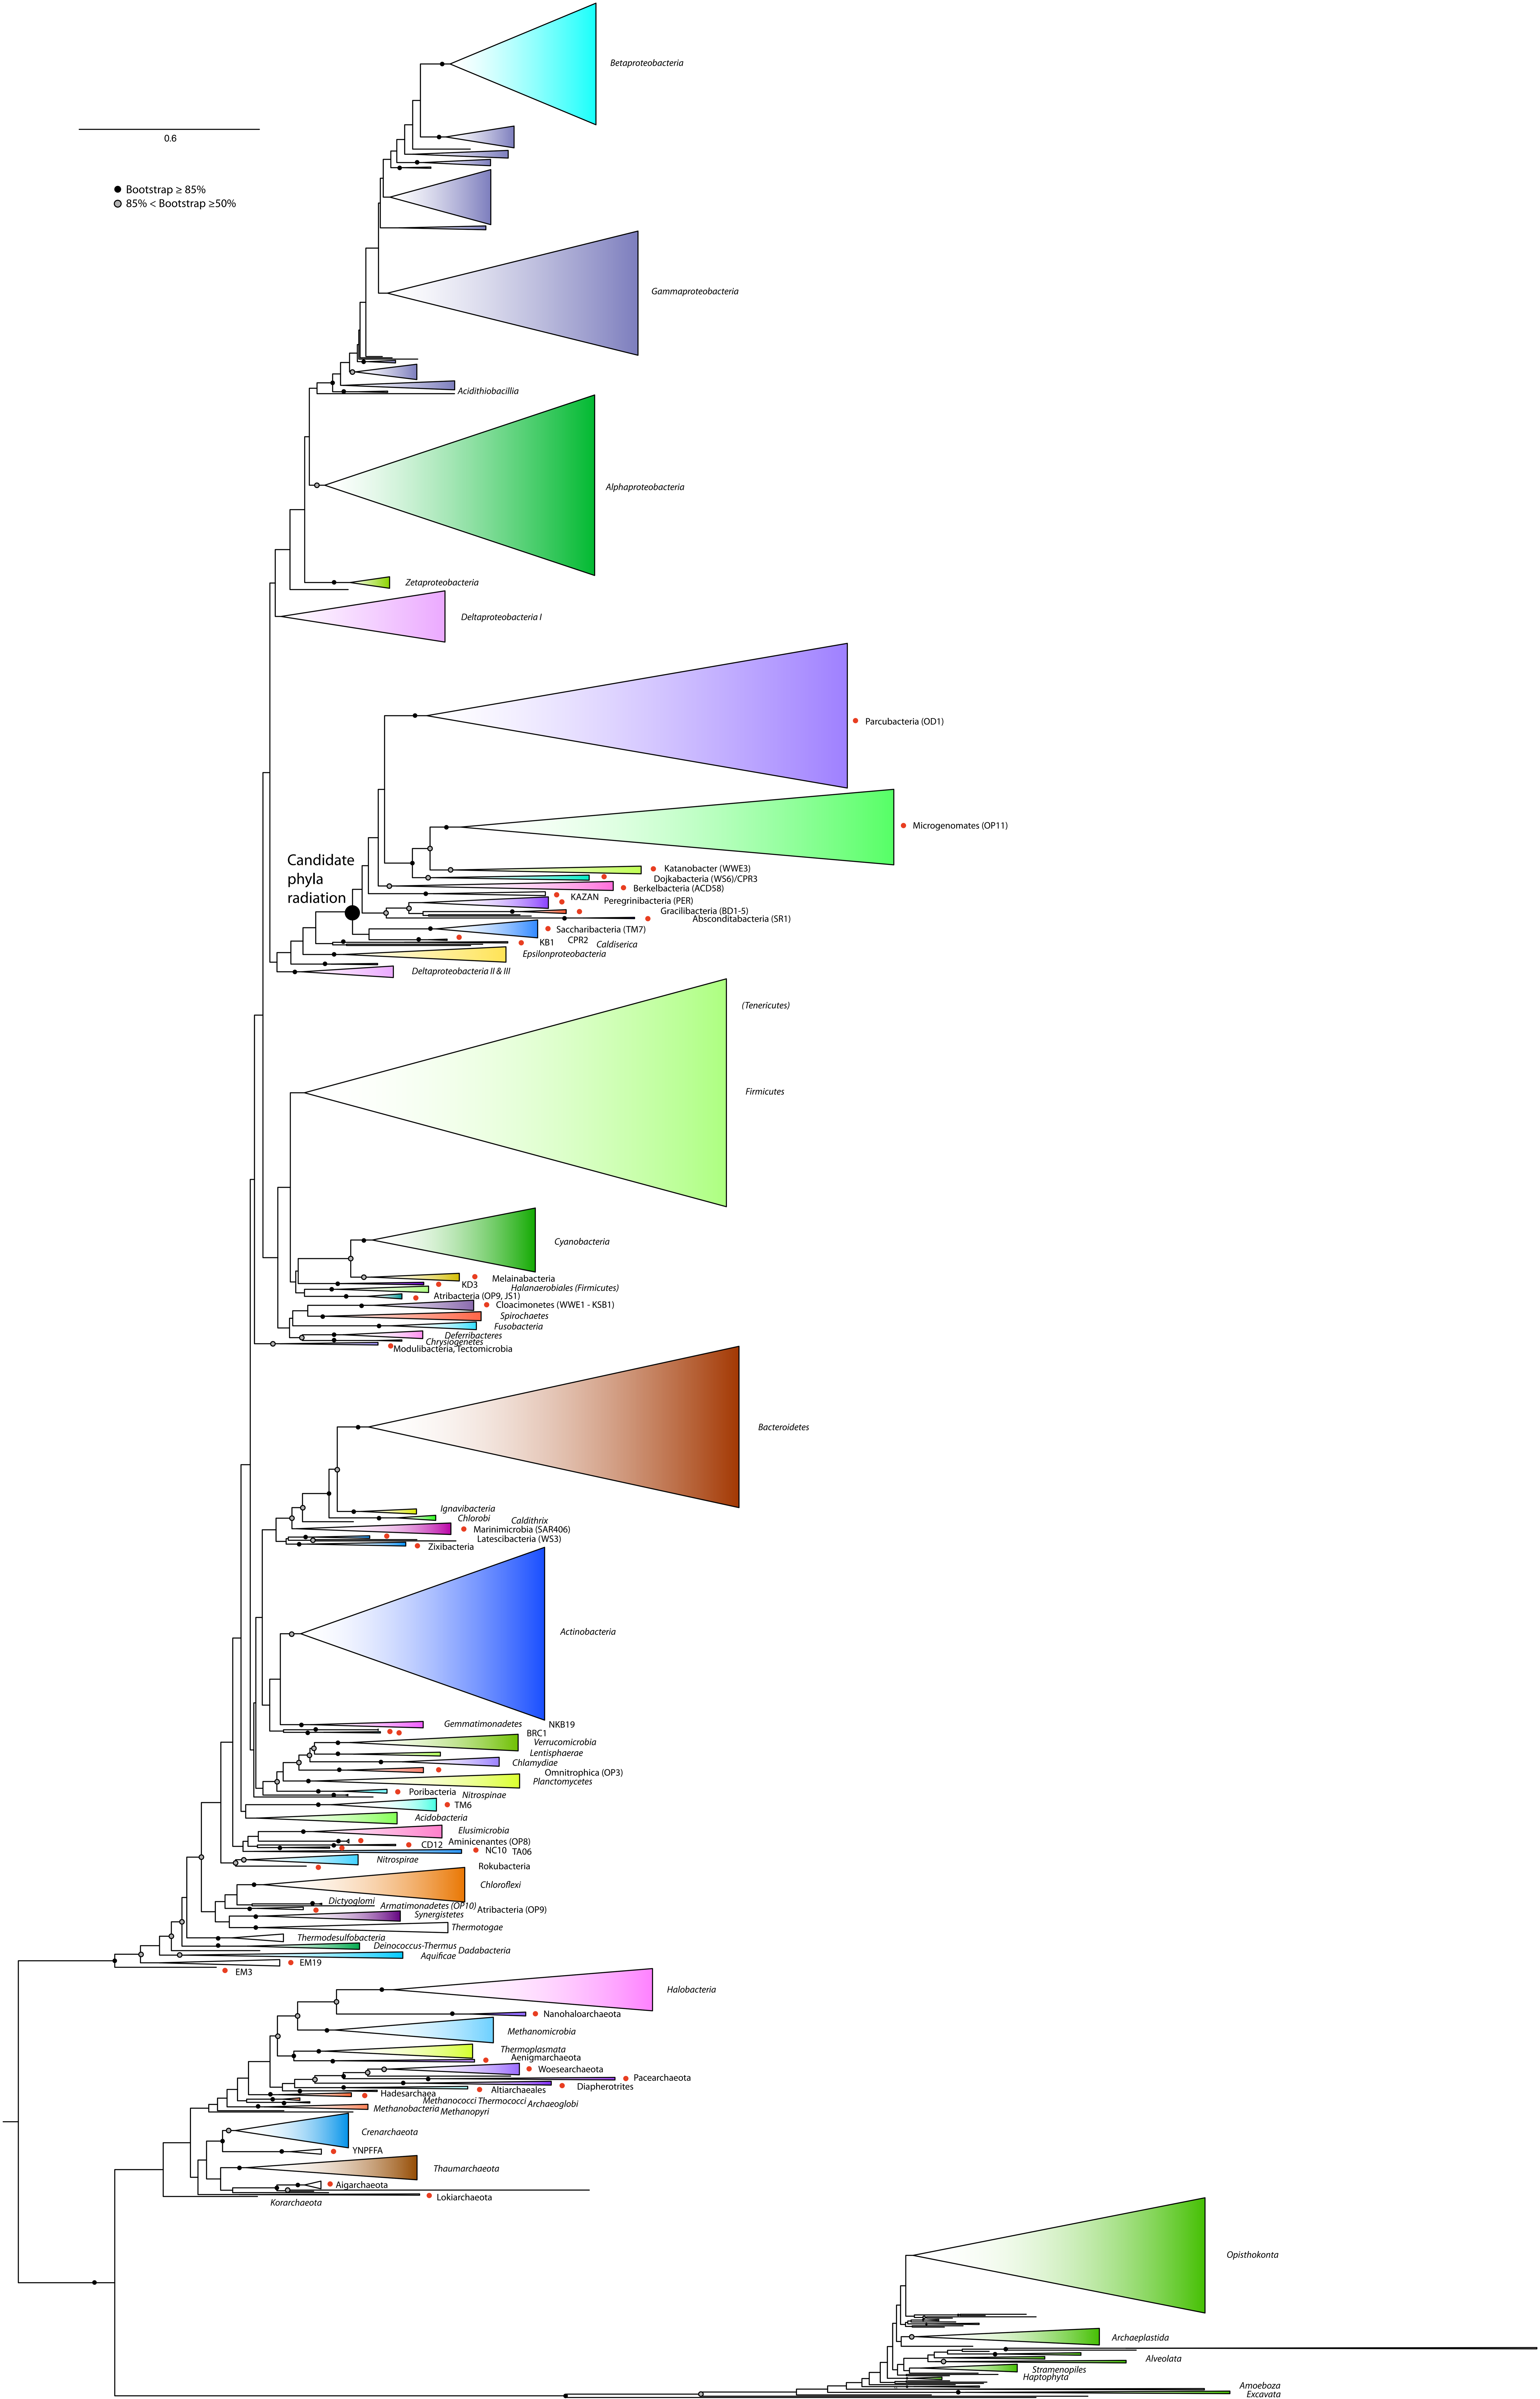

Supplementary Figure 2 – Condensed maximum likelihood tree based on an alignment of SSU rRNA gene sequences. Major lineages are collapsed and labeled as in Figure 1, with well-defined lineages named using italic font and lineages lacking an isolated representative named in regular font and highlighted with red dots. Bootstrap support values are indicated by circles on nodes – black for support of 85% and above, grey for support from 50% to 84%. The full SSU rRNA gene tree is available in newick format as Supplementary Dataset 4.
